# Supplementary material for: miR-140-5p suppresses the proliferation, migration and invasion of gastric cancer by regulating YES1
Source: Mol Cancer. 2017 Aug 17;16:139. doi: 10.1186/s12943-017-0708-6 (PMC5561618; doi:10.1186/s12943-017-0708-6)
Supplement: Supplementary file 1 — Correlations between the miR-140-5p levels and the clinicopathologic features of the 144 patients with GC. (XLS 23 kb) [file 12943_2017_708_MOESM1_ESM.xls]

## Sheet: Sheet1
Supplementary Table1 Correlations between miR-140-5p level and clinicopathologic features in 144 GC patients
Variables	Total	miR-140-5p level		P value
		Low (%)	High(%)
Age(years)
< 61	63	21(33.3)	42(66.7)	0.875
≥ 61	81	26(32.1)	55(67.9)
Gender
Male	110	40(36.4)	70(63.6)	0.086
Female	34	7(20.6)	27(79.4)
Tumor diameter(cm)
< 6	59	17(28.8)	42(71.2)	0.073
≥ 6	85	37(43.5)	48(56.5)
Location
Upper	65	23(35.4)	42(64.6)	0.502
Middle	33	8(24.2)	25(75.8)
Lower	46	16(34.8)	30(65.2)
Differentiation
High/moderate	45	10(22.2)	35(77.8)	0.072
Low/undifferentiated	99	37(37.4)	62(62.6)
Depth of invasion
T1/T2	21	5(23.8)	16(76.2)	0.35
T3/T4	123	42(34.1)	81(65.9)
Lymph node metastasis
Absent	38	10(26.3)	28(73.7)	0.333
Present	106	37(34.9)	69(65.1)
TNM stages
I/II	48	11(22.9)	37(77.1)	0.079
III/IV	96	36(37.5)	60(62.5)
Abbreviations: GC gastric cancer TNM tumor-node-metastasis. Variables were detected by Pearson Chi-square test. P value less than 0.05 was defined statistically significant
